# Supplementary material
Source: PubMed Central journal article supplement (PMC9992270)
Supplement: NIHMS1869063-supplement-1869063_SD_Fig_2_unprocessed_WB.pdf [file NIHMS1869063-supplement-1869063_SD_Fig_2_unprocessed_WB.pdf]

453

|                                                  |
|--------------------------------------------------|
| V = Vehicle<br>R = Ricolinorbat<br>P = Peditaxel |
|--------------------------------------------------|

436

Ac-tub

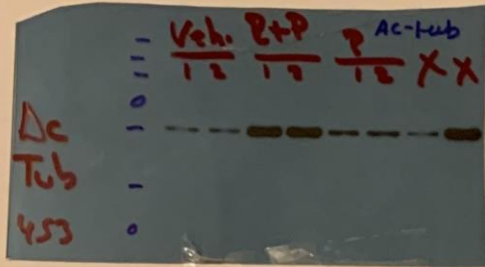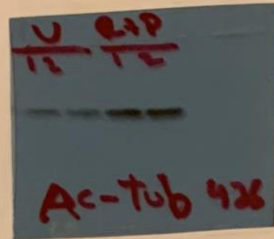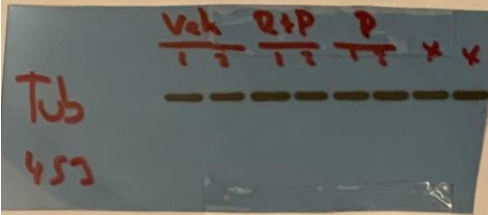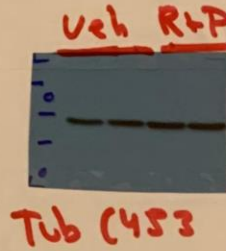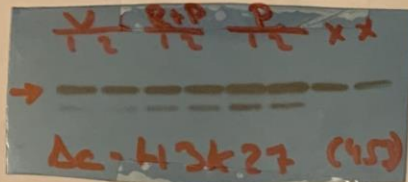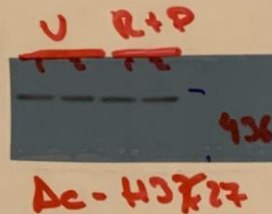

Unprocessed blots for Fig 2b

MMTV

V = Vehicle  
R = Resveratrol  
P = Paclitaxel

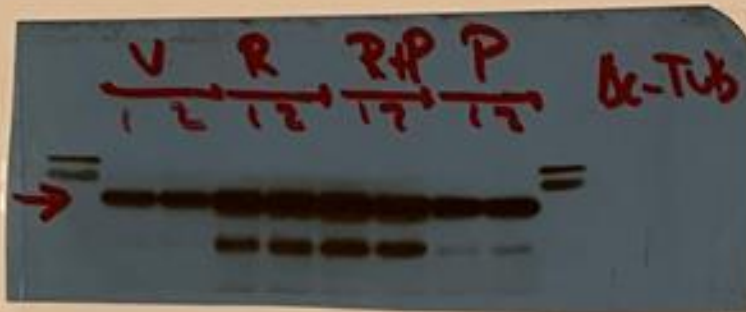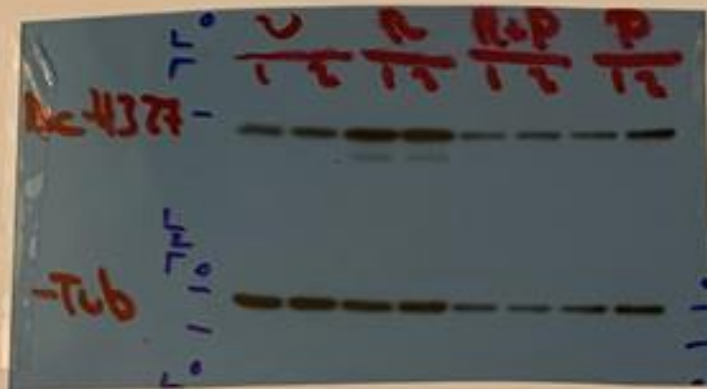

Unprocessed blots for Fig 2e
