# Supplementary material
Source: PubMed Central journal article supplement (PMC9992270)

Unprocessed blots for Extended data Fig. 10

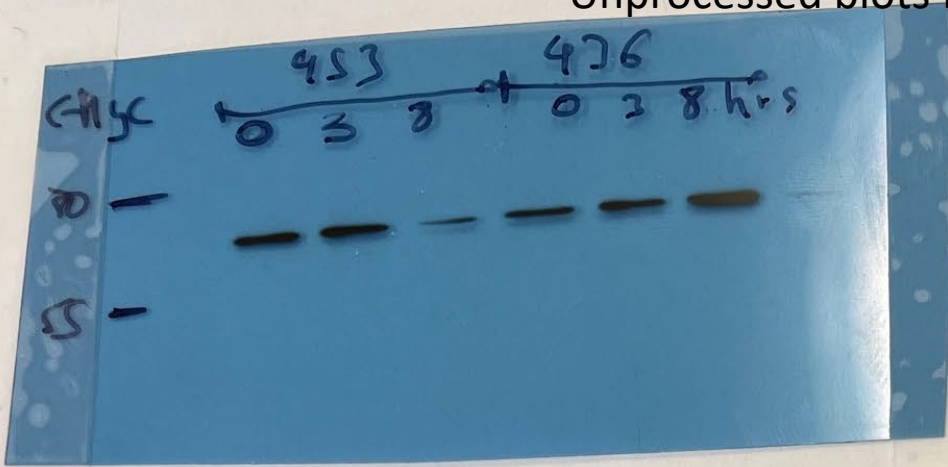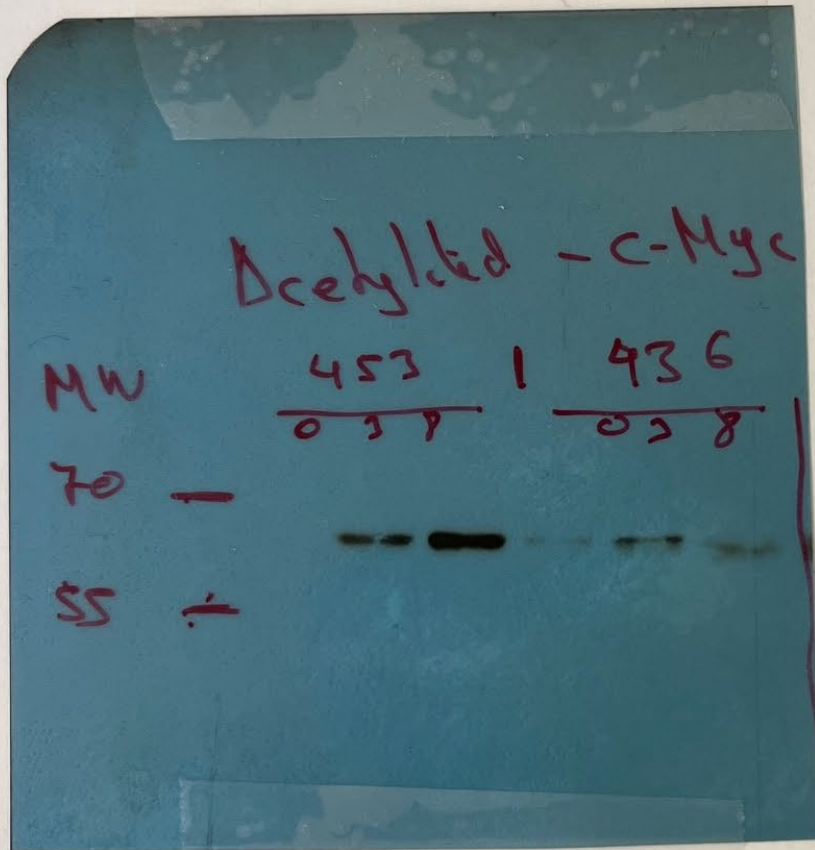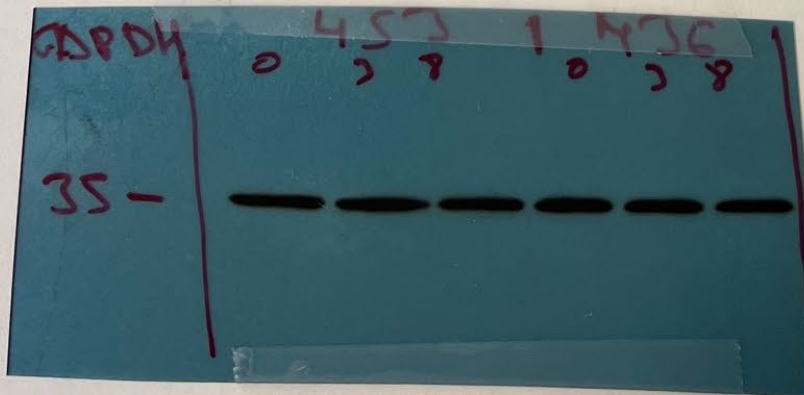

Supplement: NIHMS1869063-supplement-1869063_SD_ED_Fig_10_unprocessed_WB.pdf [file NIHMS1869063-supplement-1869063_SD_ED_Fig_10_unprocessed_WB.pdf]

Unprocessed blots for Fig 1f

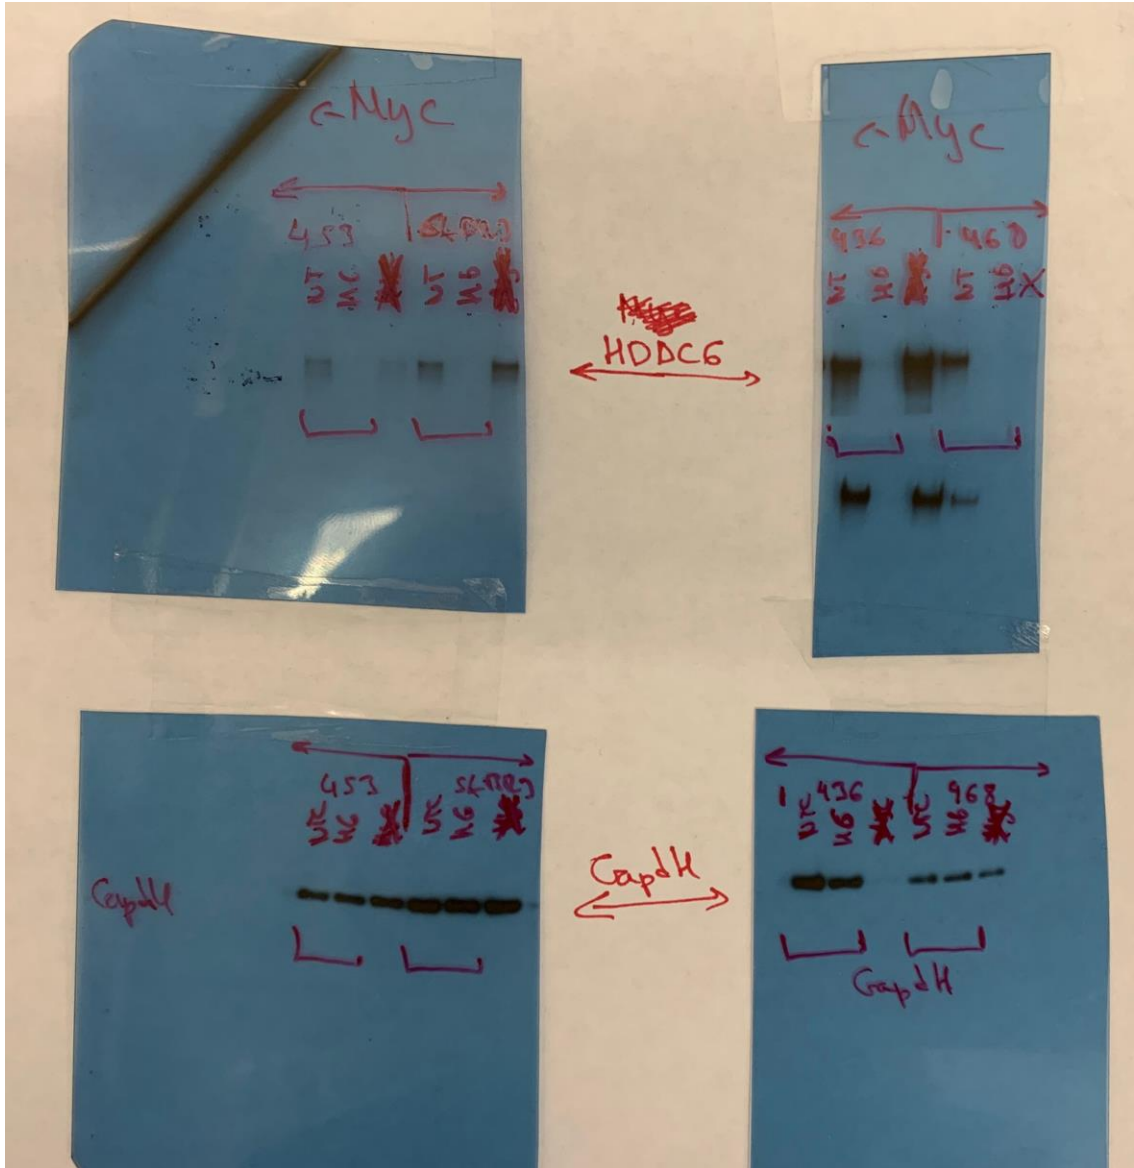

Supplement: NIHMS1869063-supplement-1869063_SD_Fig_1_unprocessed_WB.pdf [file NIHMS1869063-supplement-1869063_SD_Fig_1_unprocessed_WB.pdf]
